# Supplementary material for: Preoperative Biomarkers and Survival in Chinese Breast Cancer Patients with HIV: A Propensity-Score-Matched-Cohort Study
Source: MDPI journal article supplement (doi:10.3390/v15071490), 2023-06-30
Supplement: s1 [file s1]

## Supplementary Materials

Table S1: Diagnostic value of different prognosis biomarkers calculated by Max rank statistic.

|                                | Overall Survival |            |          | Progression Free Survival |            |          |
|--------------------------------|------------------|------------|----------|---------------------------|------------|----------|
|                                | cut off value    | statistics | Log-rank | cut off value             | statistics | Log-rank |
| Neutrophil-to-lymphocyte ratio | 0.88             | 1.90       | 0.21     | 1.50                      | 1.79       | 0.08     |
| Lymphocyte-to-monocyte ratio   | 3.59             | 1.72       | 0.06     | 3.59                      | 2.13       | 0.02     |
| Platelet-to-lymphocyte ratio   | 98.17            | 1.91       | 0.09     | 98.17                     | 2.36       | 0.03     |
| CD4                            | 550.00           | 1.16       | 0.35     | 336.70                    | 1.55       | 0.13     |
| CD8                            | 758.00           | 2.26       | 0.04     | 662.70                    | 2.63       | <0.01    |
| CD4/CD8                        | 0.48             | 1.83       | 0.08     | 0.29                      | 1.99       | 0.06     |
| CD3                            | 1033.80          | 1.50       | 0.08     | 1033.80                   | 2.29       | 0.01     |

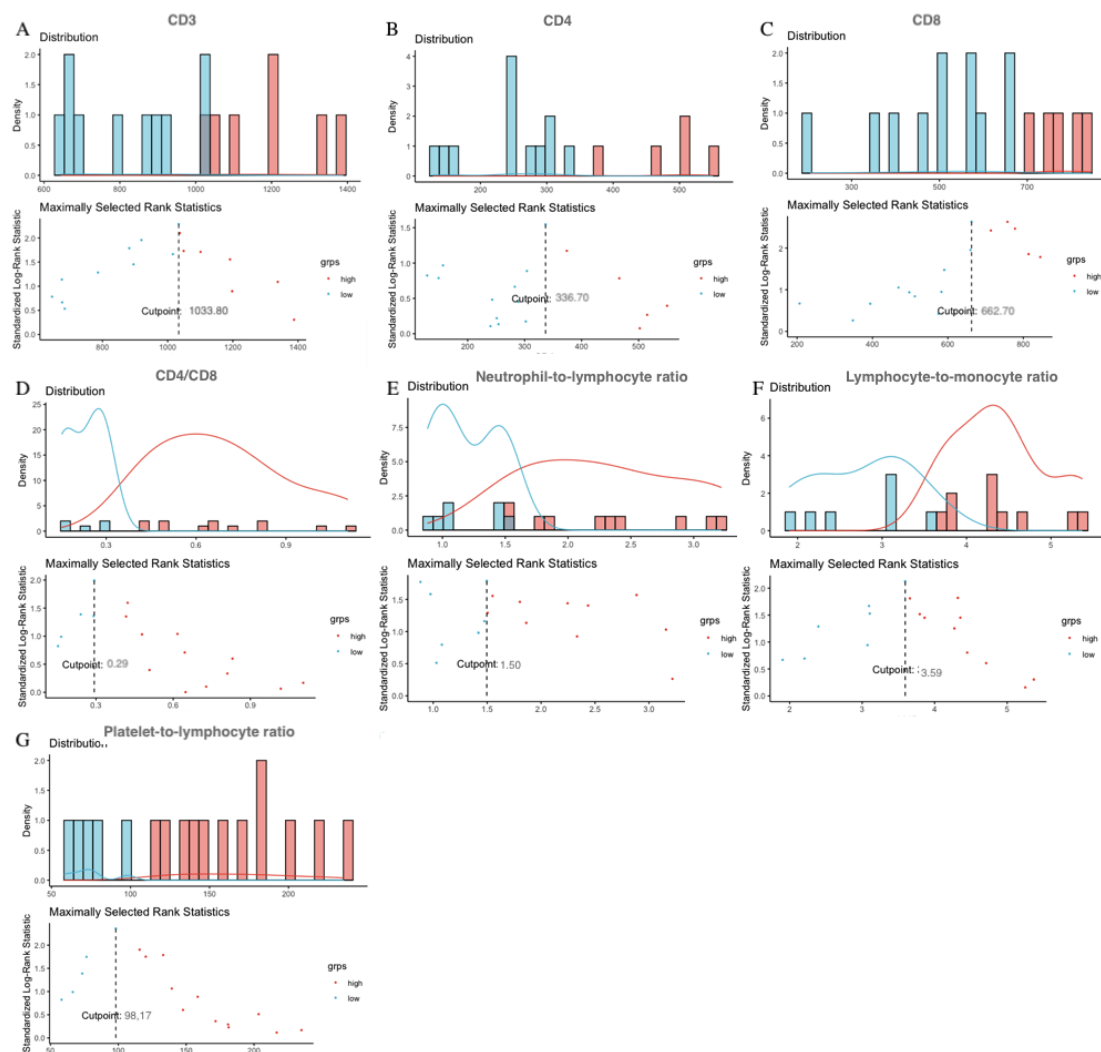

**Figure S1.** Distribution plot of different preoperative biomarkers for progression free survival in breast cancer patients with HIV. (A) CD3; (B) CD4; (C) CD8; (D) CD4/CD8 ratio; (E) neutrophil-to-lymphocyte ratio; (F) lymphocyte-to-monocyte ratio; (G) platelet-to-lymphocyte ratio.

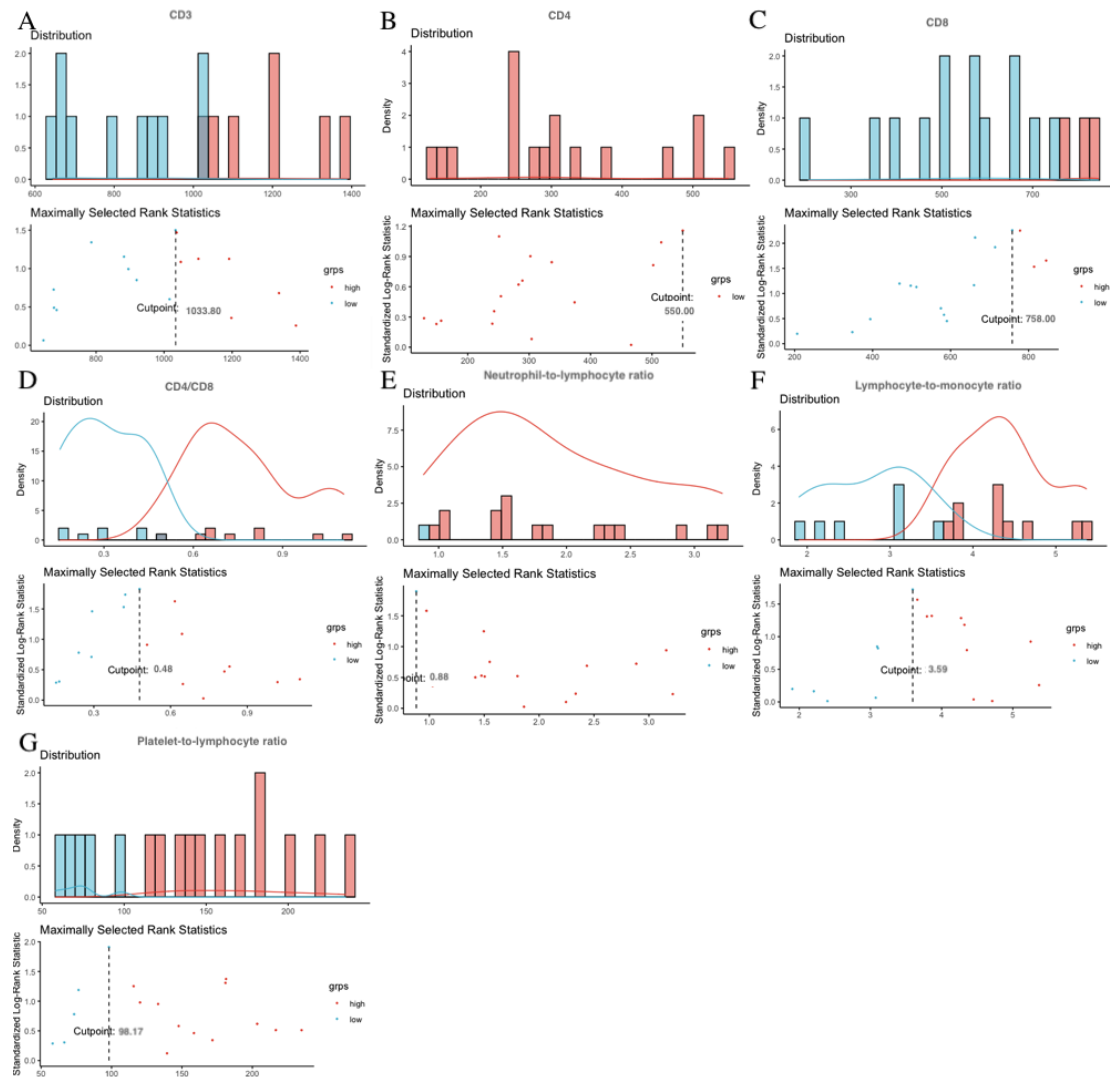

**Figure S2.** Distribution plot of different preoperative biomarkers for overall survival in breast cancer patients with HIV. (A) CD3; (B) CD4; (C) CD8; (D) CD4/CD8 ratio; (E) neutrophil-to-lymphocyte ratio; (F) lymphocyte-to-monocyte ratio; (G) platelet-to-lymphocyte ratio.
